# Supplementary material for: STAT1-mediated inhibition of FOXM1 enhances gemcitabine sensitivity in pancreatic cancer
Source: Clin Sci (Lond). 2019 Mar 1;133(5):645–63. doi: 10.1042/CS20180816 (PMC6395369; doi:10.1042/CS20180816)
Supplement: Supplementary file 1 [file cs-133-cs20180816_supp1.pdf]

A.

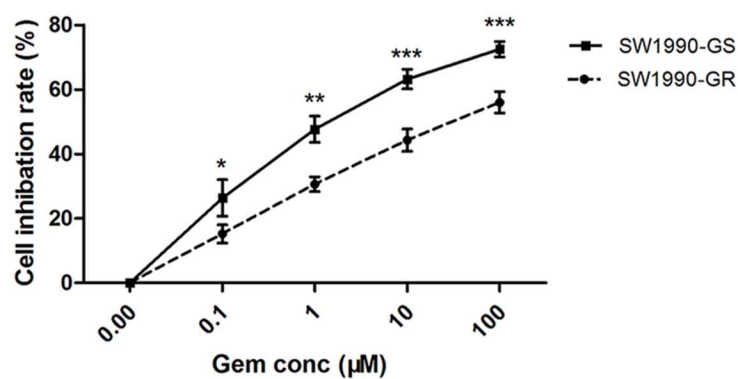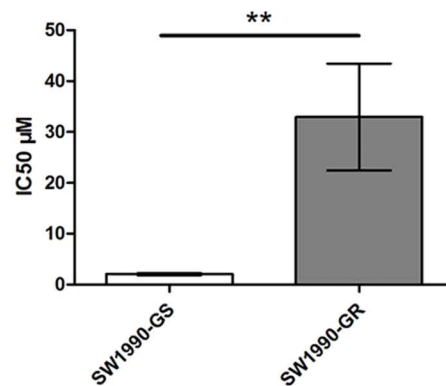

B.

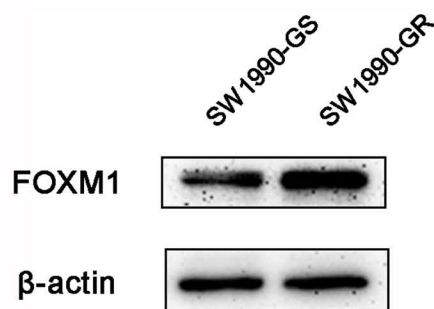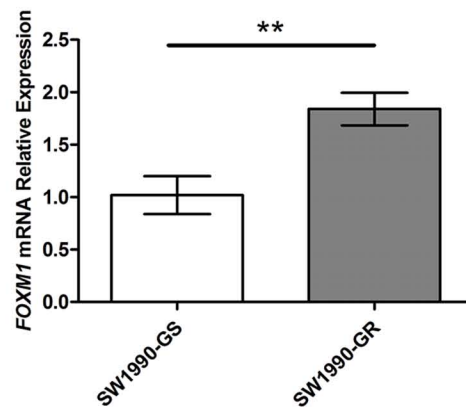

C.

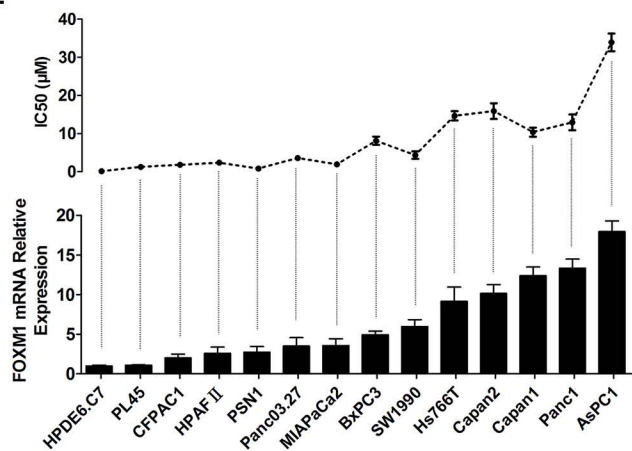

D.

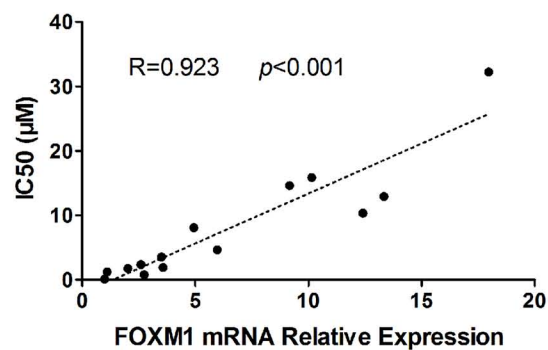

Fig S1

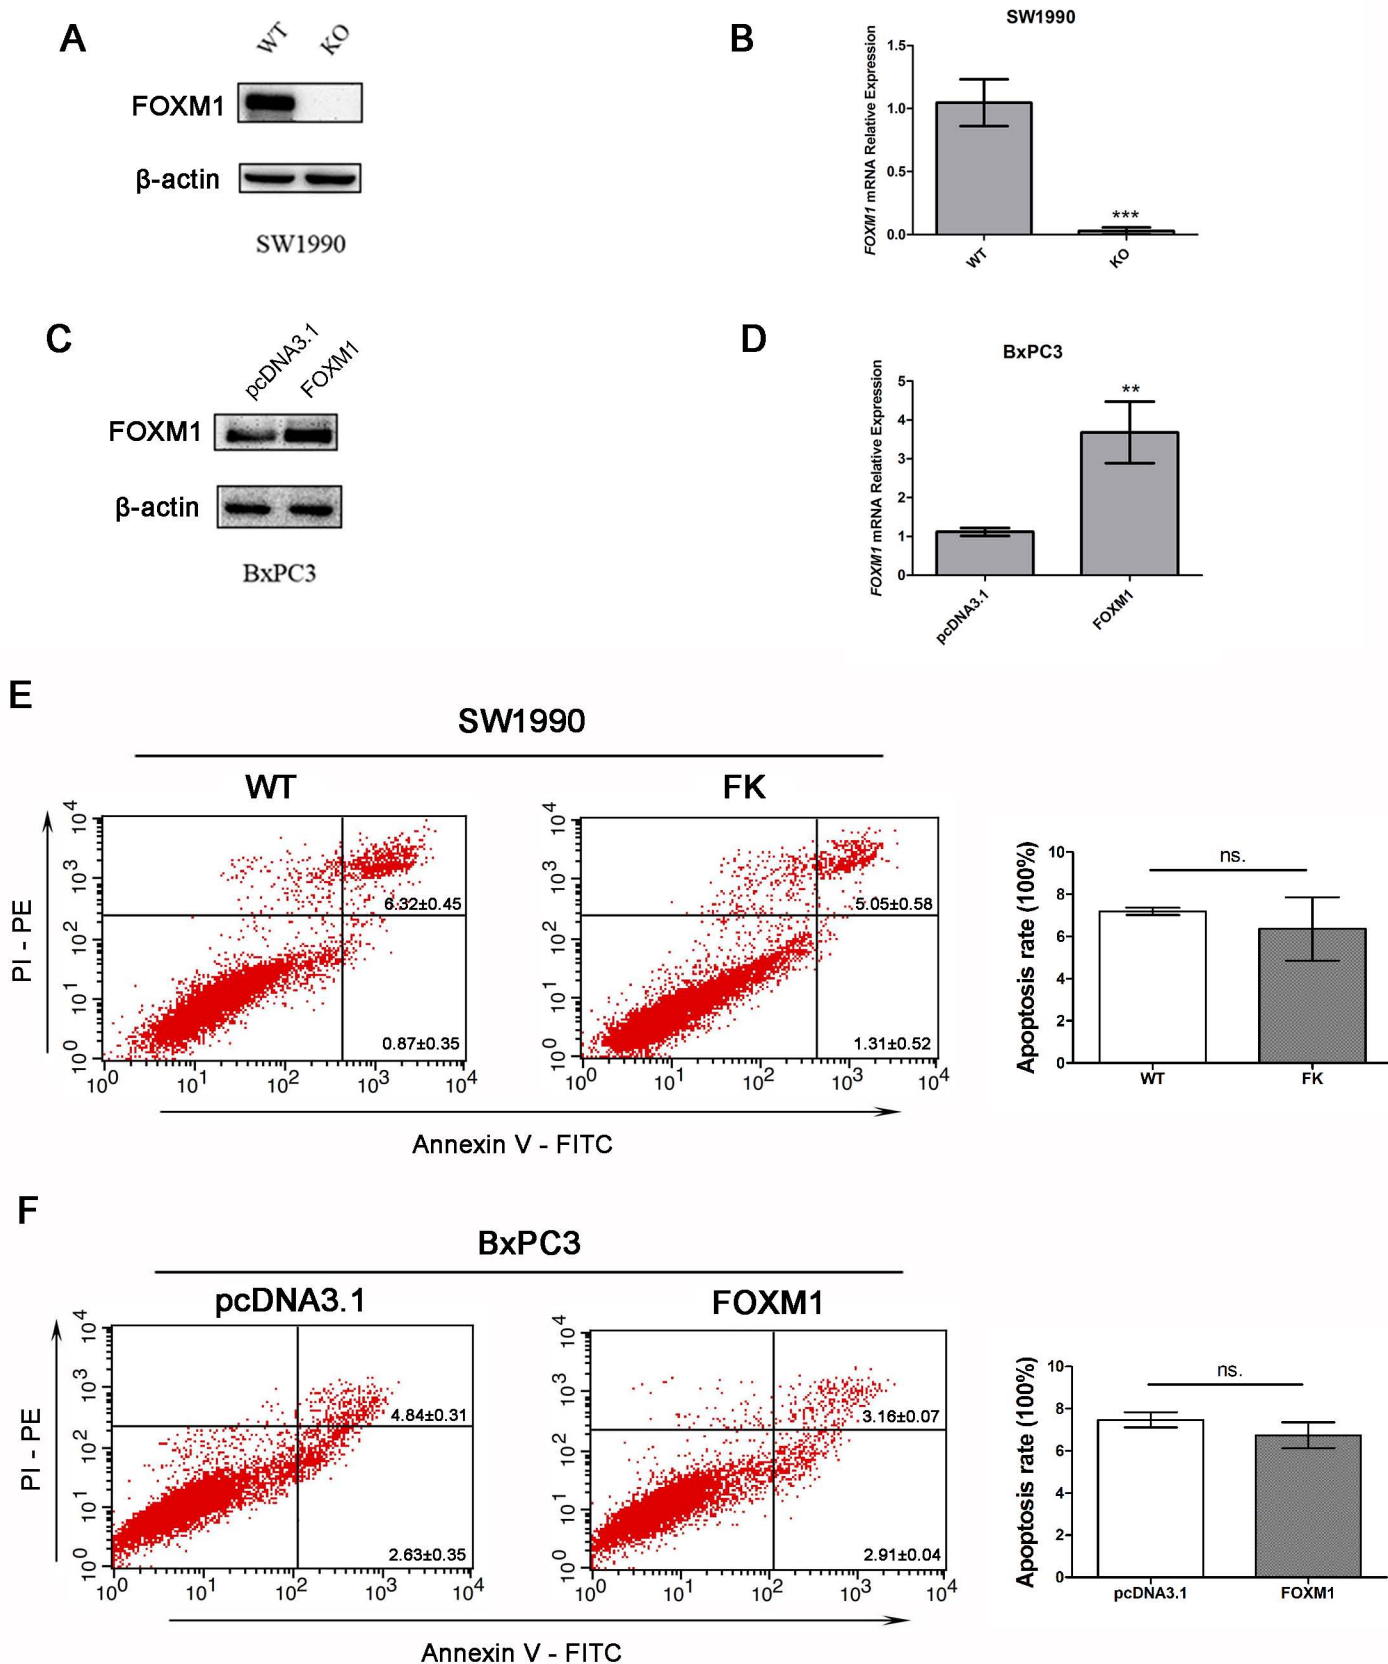

Fig S2

**A**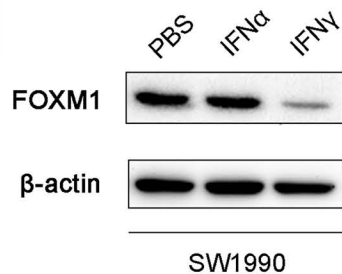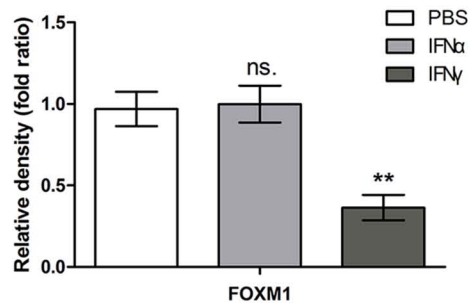**B**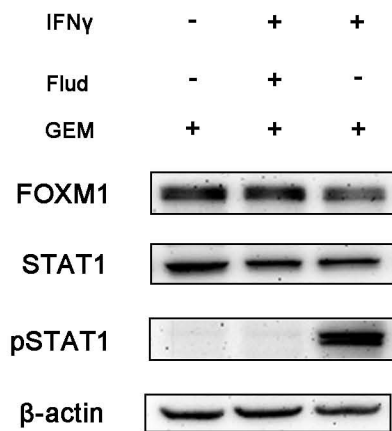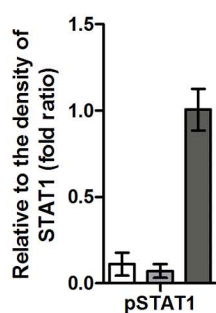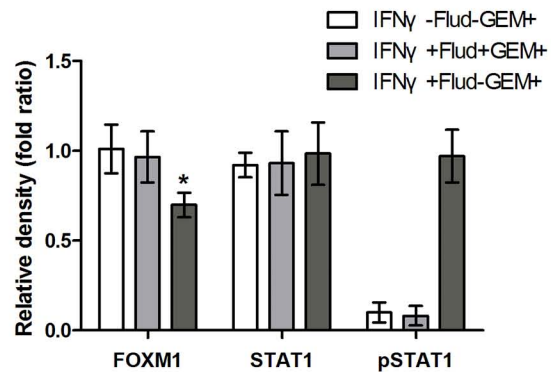**Fig S3**

**A**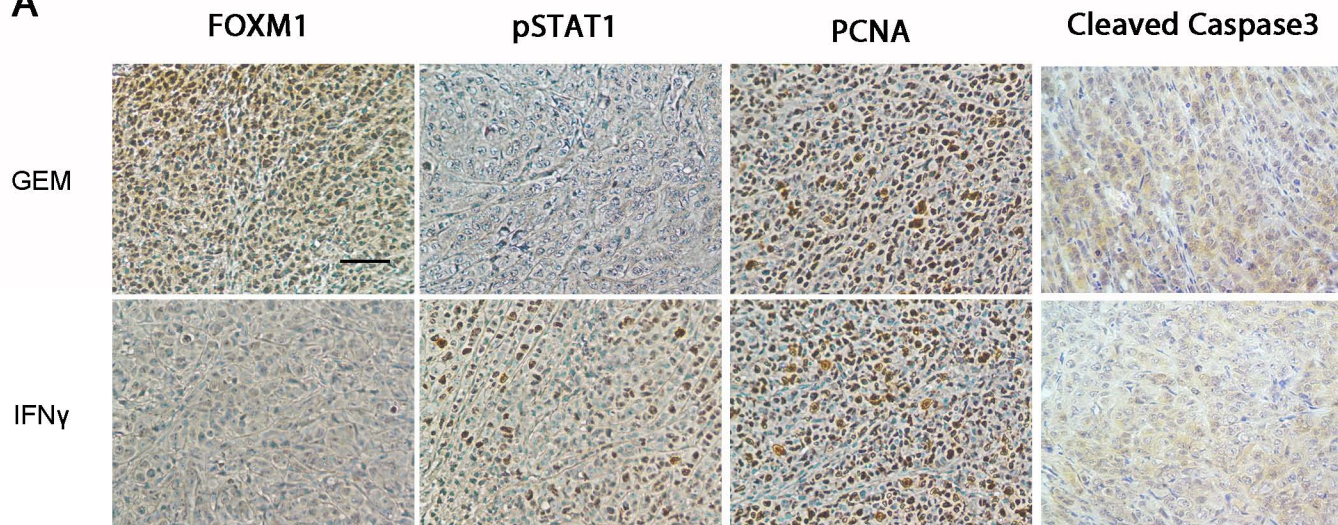**B**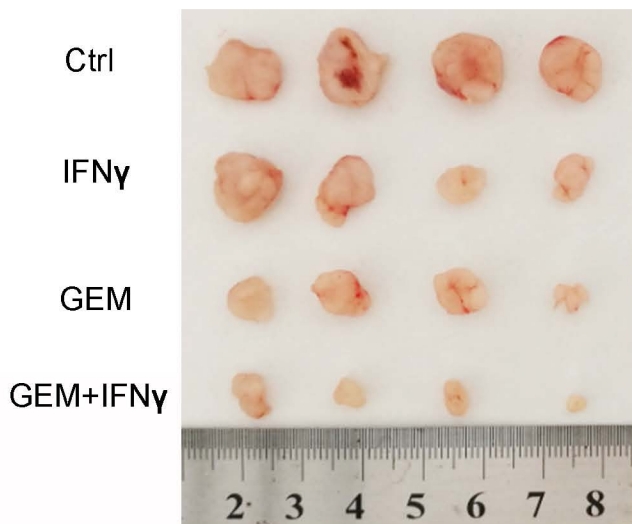**C**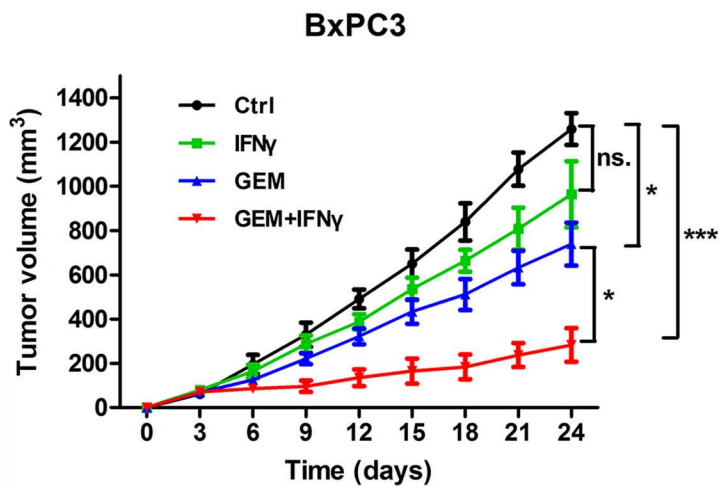**Fig S4**

**Table S1 General information of pancreatic cancer patients (93 cases).**

| Category                     | n (%)     |
|------------------------------|-----------|
| Gender                       |           |
| Male                         | 57 (61.3) |
| Female                       | 36 (38.7) |
| Age (years)                  |           |
| >65                          | 23 (24.7) |
| <65                          | 70 (75.3) |
| Histological differentiation |           |
| Well/Moderately              | 46 (49.5) |
| Poorly                       | 47 (50.5) |
| Depth of invasion            |           |
| T1, 2                        | 68 (73.1) |
| T3, 4                        | 25 (26.9) |
| Lymph node metastasis        |           |
| Negative                     | 76 (81.7) |
| Positive                     | 17 (18.3) |
| Pathologic stage             |           |
| I , II                       | 74 (79.6) |
| III, IV                      | 19 (20.4) |
| Chemotherapy regimens        |           |
| GEM                          | 57 (61.3) |
| GEM+5-Fu/DDP/OXA             | 36 (38.7) |
